# Supplementary material for: Crizotinib sensitizes the erlotinib resistant HCC827GR5 cell line by influencing lysosomal function
Source: PubMed Central journal article supplement (PMC7540474; doi:10.1002/jcp.29463), 2020-01-20

Supplementary Figure 2

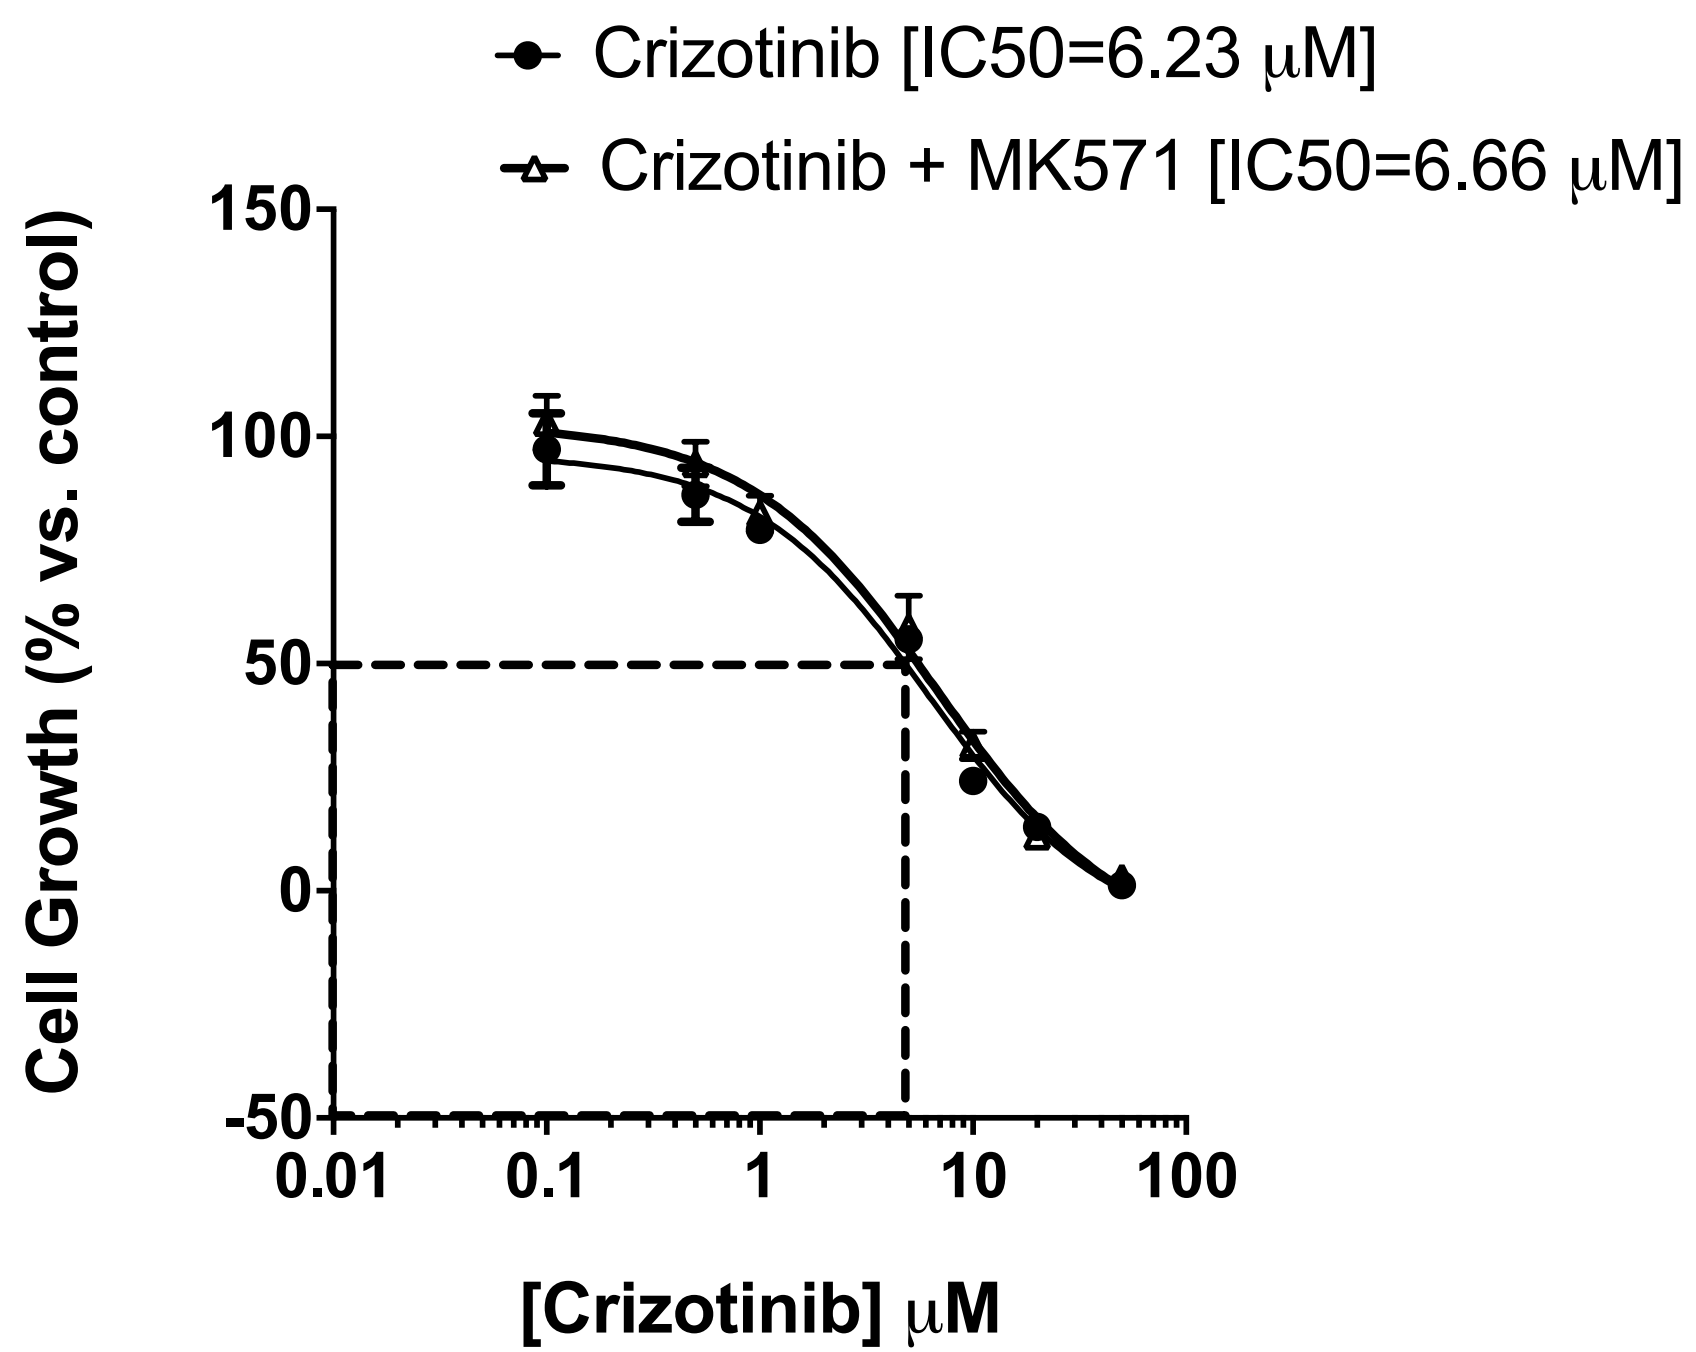

Supplement: JCP-235-8085-s004.pdf [file JCP-235-8085-s004.pdf]
